# Supplementary figures and images for: Indoor mould exposure, asthma and rhinitis: findings from systematic reviews and recent longitudinal studies
Source: PubMed Central journal article supplement — Eur Respir Rev. 2018 May 16;27(148):170137. doi: 10.1183/16000617.0137-2017 (PMC9489198; doi:10.1183/16000617.0137-2017), 2018-05-16

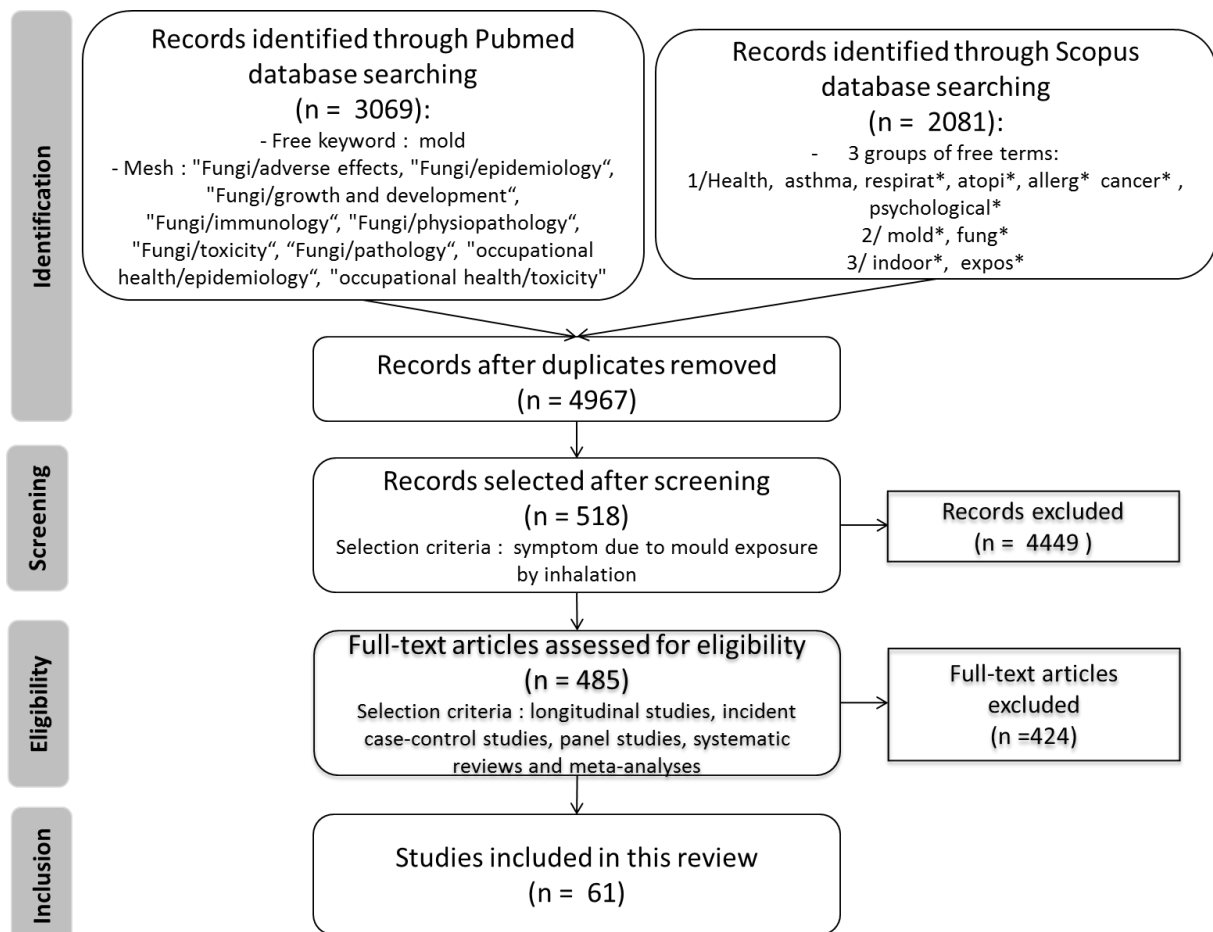

Figure E1: Literature search based on the four-phase flow diagram of PRISMA statement.

Supplement: err-0137-2017-FigureE1.pdf [file err-0137-2017-FigureE1.pdf]
